# Supplementary material for: Controlled Electron-Beam Synthesis of Transparent Hydrogels for Drug Delivery Applications
Source: PubMed Central journal article supplement (PMC6473313; doi:10.3390/polym11030501), 2019-03-14
Supplement: polymers-11-00501-s001.pdf [file polymers-11-00501-s001.pdf]

Article

# Controlled electron beam synthesis of transparent hydrogels for drug delivery applications

## Electronic Supplementary Information

Sarah Glass <sup>1</sup>, Mathias Kühnert<sup>1</sup>, Bernd Abel<sup>1</sup> and Agnes Schulze <sup>1,\*</sup>

<sup>1</sup> Leibniz Institute of Surface Engineering (IOM), Permoserstraße 15, D-04318 Leipzig; sarah.glass@iom-leipzig.de (S.G.); mathias.kuehnert@iom-leipzig.de (M.K.); [bernd.abel@iom-leipzig.de](mailto:bernd.abel@iom-leipzig.de) (B.A.); agnes.schulze@iom-leipzig.de (A.S.)

\* Correspondence: Agnes.Schulze@iom-leipzig.de; Tel.: +49-(0)341-235-2400

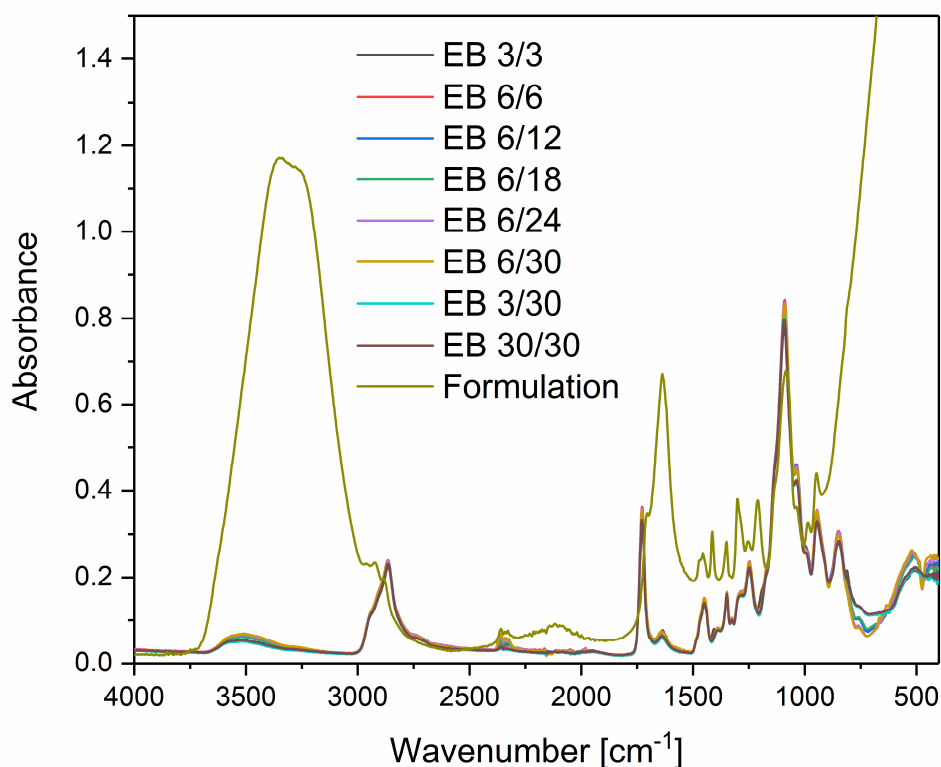

Figure S1: FT-IR spectra of the hydrogels and of the monomer formulation. Spectra were recorded measuring ATR-IR using a Vector II Fourier-transform infrared (FTIR) spectrometer from Billerica, MA, USA). Spectra were normalized to the IR band at 1705  $\text{cm}^{-1}$ .
